# Supplementary material for: Synthesis of Pt doped Mg–Al layered double oxide/graphene oxide hybrid as novel NOx storage–reduction catalyst
Source: Royal Society of Chemistry journal article supplement (doi:10.1039/c5ra16127d), 2015-01-01
Supplement: c5ra16127d1.pdf [file c5ra16127d1.pdf]

Supporting information

**Synthesis of Pt doped Mg–Al layered double hydroxide/graphene  
oxide hybrid as novel NO<sub>x</sub> storage–reduction catalyst**

Xueyi Mei,<sup>1</sup> Junya Wang,<sup>1</sup> Ruoyan Yang,<sup>1</sup> Qinghua Yan,<sup>1</sup> Qiang Wang<sup>1,\*</sup>

<sup>1</sup>College of Environmental Science and Engineering, Beijing Forestry University, 35  
Qinghua East Road, Haidian District, Beijing 100083, P. R. China

\*Corresponding author:

Professor Qiang Wang, College of Environmental Science and Engineering, Beijing  
Forestry University, 35 Qinghua East Road, Haidian District, Beijing 100083, P. R.  
China

Tel.: 86–13699130626

E-mail: [qiang.wang.ox@gmail.com](mailto:qiang.wang.ox@gmail.com); [qiangwang@bjfu.edu.cn](mailto:qiangwang@bjfu.edu.cn)

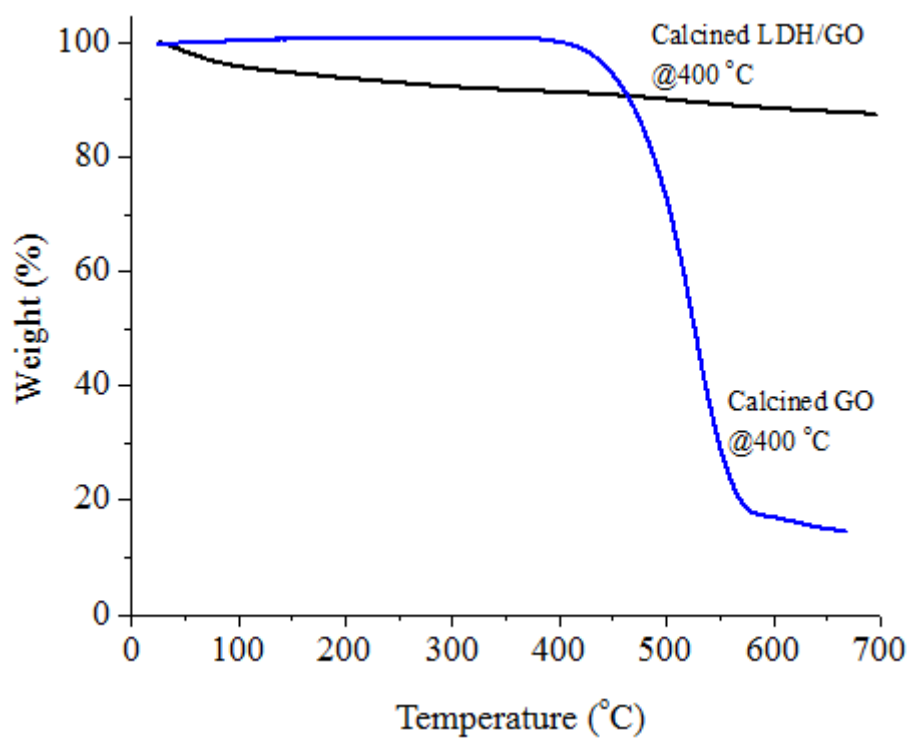

**Figure S1.** TGA analyses of LDO/GO and calcined GO in the temperature range of 20–700 °C and in the presence of air.
